# Supplementary material for: Characterization of polybacterial clinical samples using a set of group-specific broad-range primers targeting the 16S rRNA gene followed by DNA sequencing and RipSeq analysis
Source: PubMed Central journal article supplement (PMC3168215; doi:10.1099/jmm.0.028373-0), 2011-07
Supplement: supp_60.7.927_Table_S2.pdf [file supp_60.7.927_Table_S2.pdf]

**Table S2.** Primer cross-reactivity experiments with artificial bacterial DNA mixes

| <b>Amplification with group A PCR</b>                 |                                                          |                                                                                         |
|-------------------------------------------------------|----------------------------------------------------------|-----------------------------------------------------------------------------------------|
| Relative DNA concentrations                           |                                                          | Chromatogram analysis                                                                   |
| <i>Streptococcus pyogenes</i><br>(plasmid group A)    | <i>Staphylococcus aureus</i><br>(plasmid group C)        |                                                                                         |
| 1                                                     | 1                                                        | <i>Streptococcus pyogenes</i>                                                           |
| 1                                                     | 10                                                       | <i>Streptococcus pyogenes</i>                                                           |
| 1                                                     | 100                                                      | <i>Streptococcus pyogenes</i>                                                           |
| 1                                                     | 1000                                                     | <i>Streptococcus pyogenes</i> +<br><i>Staphylococcus aureus</i><br>(equal peak heights) |
| <i>Streptococcus pyogenes</i><br>(plasmid group A)    | <i>Escherichia coli</i><br>(plasmid group B)             |                                                                                         |
| 1                                                     | 1                                                        | <i>Streptococcus pyogenes</i>                                                           |
| 1                                                     | 10                                                       | <i>Streptococcus pyogenes</i>                                                           |
| 1                                                     | 100                                                      | <i>Streptococcus pyogenes</i>                                                           |
| 1                                                     | 1000                                                     | <i>Streptococcus pyogenes</i>                                                           |
| <b>Amplification with group B PCR</b>                 |                                                          |                                                                                         |
| Relative DNA concentrations                           |                                                          | Chromatogram analysis                                                                   |
| <i>Klebsiella pneumoniae</i><br>(genomic DNA group B) | <i>Staphylococcus aureus</i><br>(genomic DNA group C)    |                                                                                         |
| 1                                                     | 1                                                        | <i>Klebsiella pneumoniae</i>                                                            |
| 1                                                     | 10                                                       | <i>Klebsiella pneumoniae</i>                                                            |
| 1                                                     | 100                                                      | <i>Klebsiella pneumoniae</i>                                                            |
| 1                                                     | 1000                                                     | <i>Klebsiella pneumoniae</i>                                                            |
| <i>Klebsiella pneumoniae</i><br>(genomic DNA group B) | <i>Enterococcus faecalis</i><br>(genomic DNA group A)    |                                                                                         |
| 1                                                     | 1                                                        | <i>Klebsiella pneumoniae</i>                                                            |
| 1                                                     | 10                                                       | <i>Klebsiella pneumoniae</i>                                                            |
| 1                                                     | 100                                                      | <i>Klebsiella pneumoniae</i>                                                            |
| 1                                                     | 1000                                                     | <i>Klebsiella pneumoniae</i>                                                            |
| <b>Amplification with group C PCR</b>                 |                                                          |                                                                                         |
| Relative DNA concentrations                           |                                                          | Chromatogram analysis                                                                   |
| <i>Staphylococcus aureus</i><br>(plasmid group C)     | <i>Stenotrophomonas maltophilia</i><br>(plasmid group B) |                                                                                         |
| 1                                                     | 1                                                        | <i>Staphylococcus aureus</i>                                                            |
| 1                                                     | 10                                                       | <i>Staphylococcus aureus</i>                                                            |
| 1                                                     | 100                                                      | <i>Staphylococcus aureus</i>                                                            |
| 1                                                     | 1000                                                     | <i>Staphylococcus aureus</i>                                                            |
| <i>Staphylococcus aureus</i><br>(plasmid group C)     | <i>Escherichia coli</i><br>(plasmid group B)             |                                                                                         |
| 1                                                     | 1                                                        | <i>Staphylococcus aureus</i>                                                            |
| 1                                                     | 10                                                       | <i>Staphylococcus aureus</i>                                                            |

|   |      |                                                                                                                |
|---|------|----------------------------------------------------------------------------------------------------------------|
| 1 | 100  | <i>Staphylococcus aureus</i><br>(dominant peaks)<br>+<br><i>Enterococcus faecalis</i><br>(low secondary peaks) |
| 1 | 1000 | <i>Staphylococcus aureus</i> +<br><i>Enterococcus faecalis</i><br>(equal peak heights)                         |
